# Supplementary material for: Carboxylic acid formation by hydroxyl insertion into acyl moieties on late transition metals
Source: Royal Society of Chemistry journal article supplement (doi:10.1039/c7cy00972k), 2017-01-01
Supplement: c7cy00972k1.pdf [file c7cy00972k1.pdf]

## Electronic Supplementary Information

### Carboxylic Acid Formation by Hydroxyl Insertion into Acyl Moieties on Late Transition Metals

Benjamin Chen,<sup>a,†</sup> Alexander Genest,<sup>a</sup> Adrian Hühn,<sup>a</sup> Notker Rösch<sup>a,b,\*</sup>

<sup>a</sup> Institute of High Performance Computing, Agency for Science, Technology and Research,  
1 Fusionopolis Way, #16–16 Connexis, Singapore 138632, Singapore

<sup>b</sup> Catalysis Research Center and Department Chemie, Technische Universität München,  
85747 Garching, Germany. Email: roesch@mytum.de

<sup>†</sup> Present address: Department of Chemical and Biological Engineering, University of  
Wisconsin-Madison, Madison, Wisconsin 53706, USA

<sup>\*</sup> Corresponding author.

**Table S1.** Adsorption energies  $E_{\text{ads}}(\text{X})$  of various adsorbates X ( $\text{kJ mol}^{-1}$ ).

|           |    | <b>OH</b> | <b>Acetyl</b> | <b>Propionyl</b> | <b>Acetic<br/>acid</b> | <b>Propionic<br/>acid</b> |
|-----------|----|-----------|---------------|------------------|------------------------|---------------------------|
| <b>3d</b> | Fe | −380.1    | −269.0        |                  | −46.1                  |                           |
|           | Co | −326.6    | −188.5        |                  | −35.0                  |                           |
|           | Ni | −306.7    | −197.7        |                  | −38.3                  |                           |
|           | Cu | −287.5    | −122.1        |                  | −18.8                  |                           |
| <b>4d</b> | Ru | −322.0    | −230.7        | −229.1           | −56.0                  | −50.8                     |
|           | Rh | −278.0    | −233.0        |                  | −47.0                  |                           |
|           | Pd | −238.5    | −209.9        | −204.8           | −38.7                  | −38.4                     |
|           | Ag | −238.9    | −79.2         |                  | −13.9                  |                           |
| <b>5d</b> | Os | −302.3    | −242.7        |                  | −56.6                  |                           |
|           | Ir | −258.6    | −242.0        |                  | −46.4                  |                           |
|           | Pt | −225.0    | −225.4        | −224.2           | −38.8                  | −37.8                     |
|           | Au | −173.7    | −117.0        |                  | −10.7                  |                           |

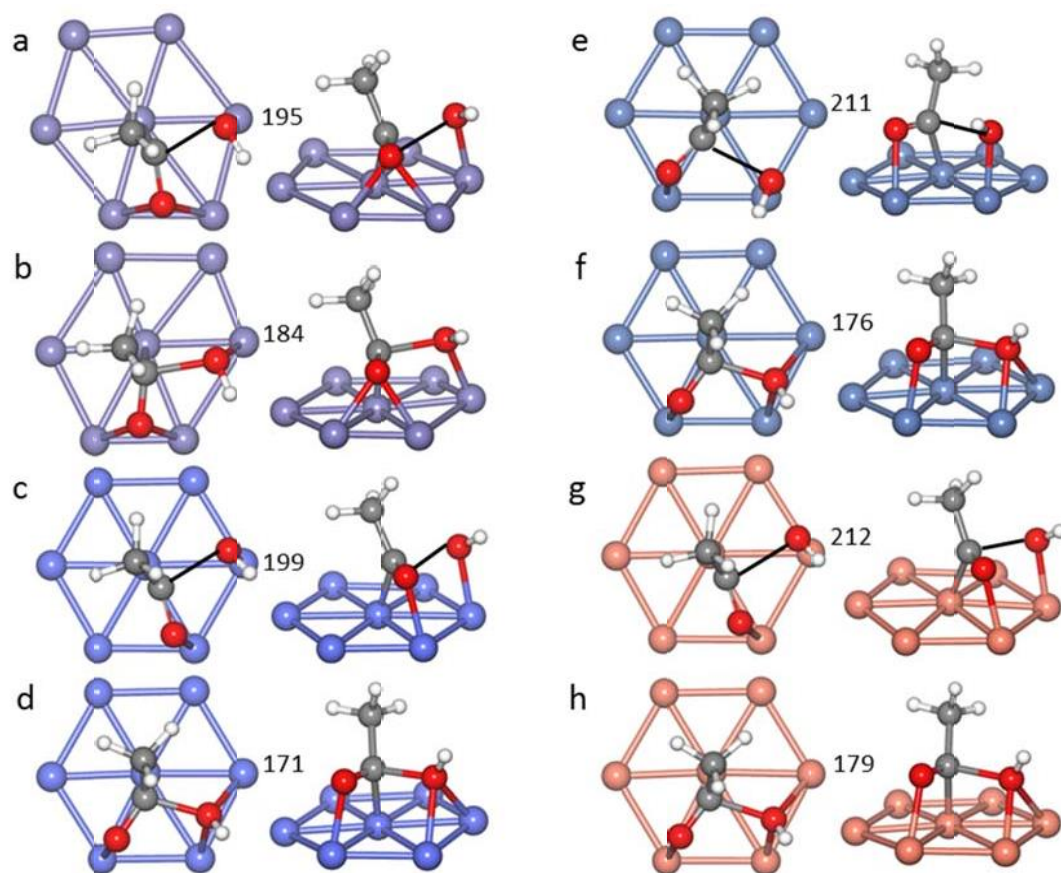

**Figure S1.** Sketches of the TS geometries of the OH insertion into an adsorbed acyl moiety on various metal surfaces (top and side views). C<sub>1</sub>-O<sub>2</sub> distances in pm. a – acetyl/Fe; b – acetyl/Co top; c – acetyl/Co bridge; d – acetyl/Ni bridge; e – acetyl/Cu top; f – acetyl/Cu bridge.

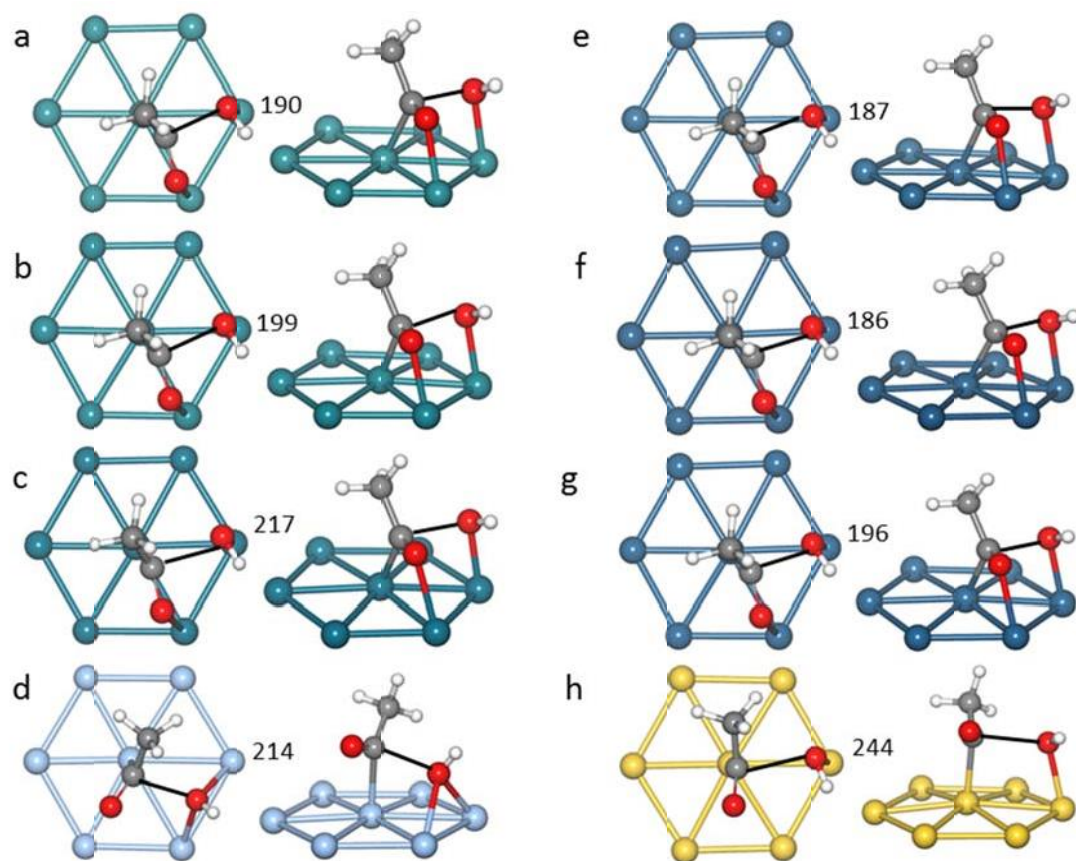

**Figure S2.** Sketches of the TS geometries of the OH insertion into an adsorbed acyl moiety on various metal surfaces (top and side views). C<sub>1</sub>-O<sub>2</sub> distances in pm. a – acetyl/Ru; b – acetyl/Rh; c – acetyl/Pd; d – acetyl/Ag; e – acetyl/Os; f – acetyl/Ir; g – acetyl/Pt; h – acetyl/Au.

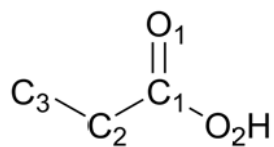

**Figure S3.** Atom labels for an acid, for the example of propanoic acid.

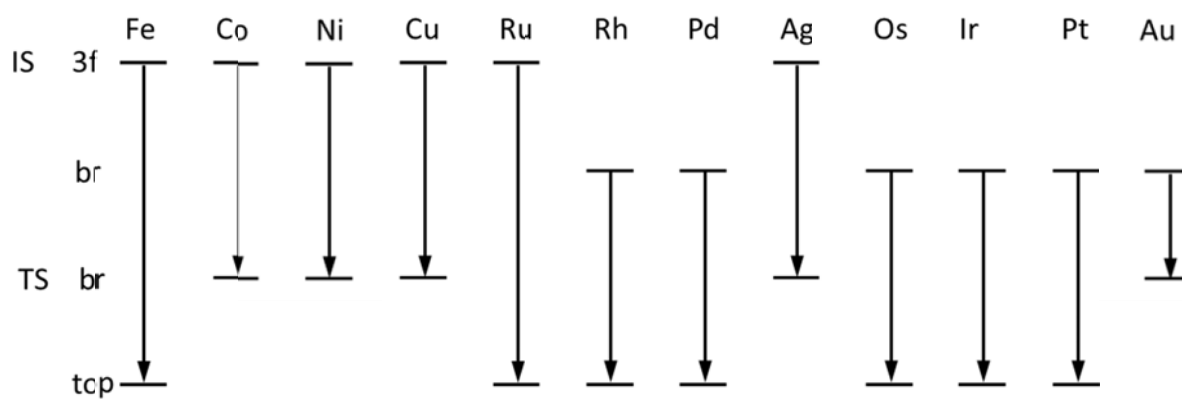

**Figure S4.** Overview of the change of adsorption site of the OH group in the IS and TS structures on the metals studied. 3f – hollow site, br – bridge site, top – top site.

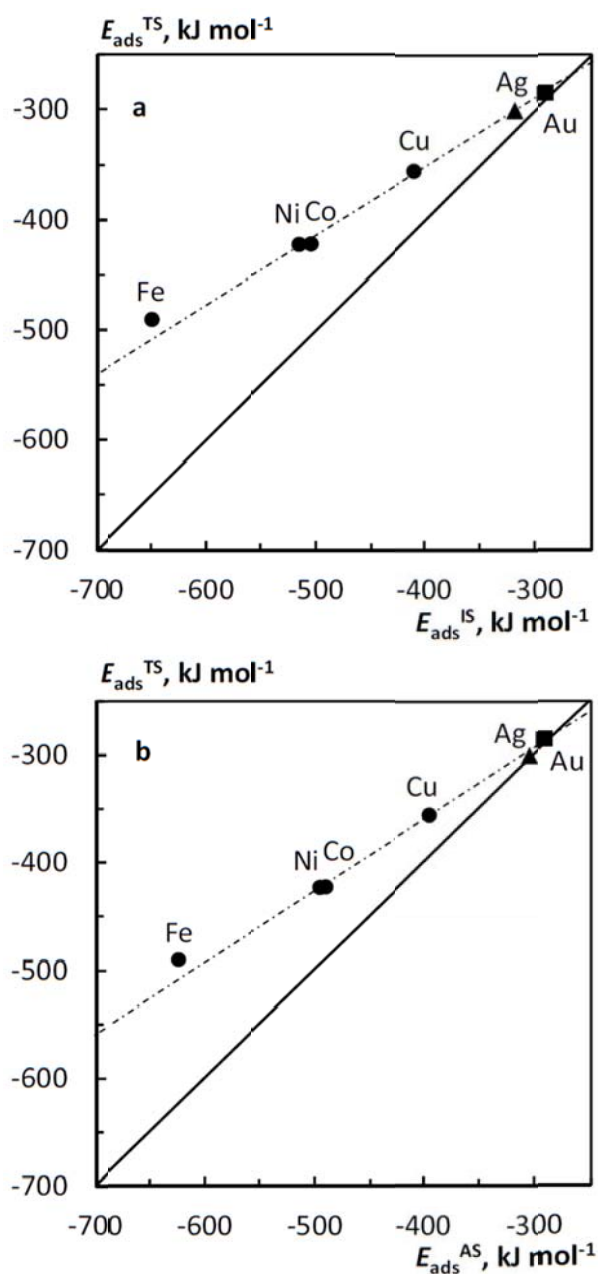

**Figure S5.** (a) BEP relation of the adsorption energies,  $E_{\text{ads}}$ , of the initial states vs. the corresponding adsorption energies,  $E_{\text{ads}}^{\text{TS}}$ , of the bridge TSs. The regression line (dashed) from a least-squares fit, excluding Fe, reads:  $E_{\text{ads}}^{\text{TS}} = 0.63 \times E_{\text{ads}}^{\text{IS}} - 119.1$  (kJ mol<sup>-1</sup>),  $R^2 = 0.98$ . (b) Similar BEP relation, but plotted against the adsorption energy,  $E_{\text{ads}}^{\text{AS}}$ , of the activated precursor states. Regression line (dashed, excluding Fe):  $E_{\text{ads}}^{\text{TS}} = 0.67 \times E_{\text{ads}}^{\text{AS}} - 94.0$  (kJ mol<sup>-1</sup>),  $R^2 = 1.00$ . In this case, mean absolute error MAE = 4 kJ mol<sup>-1</sup>.

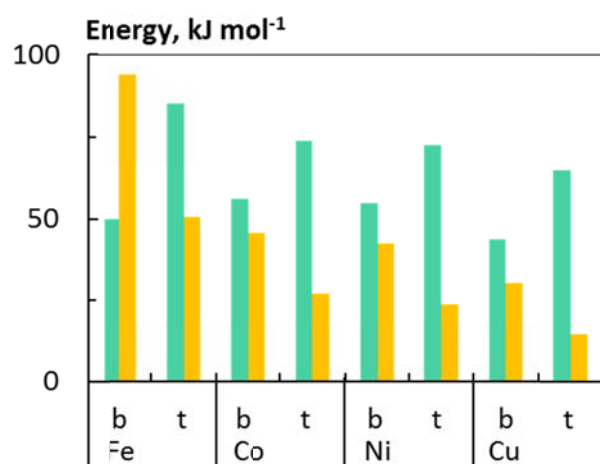

**Figure S6.** Preparation energies of OH,  $E_{\text{prep}}(\text{OH})$  (green), and acetyl,  $E_{\text{prep}}(\text{RCO})$  (yellow), of bridge (b) and top (t) TSs on 3d metals.

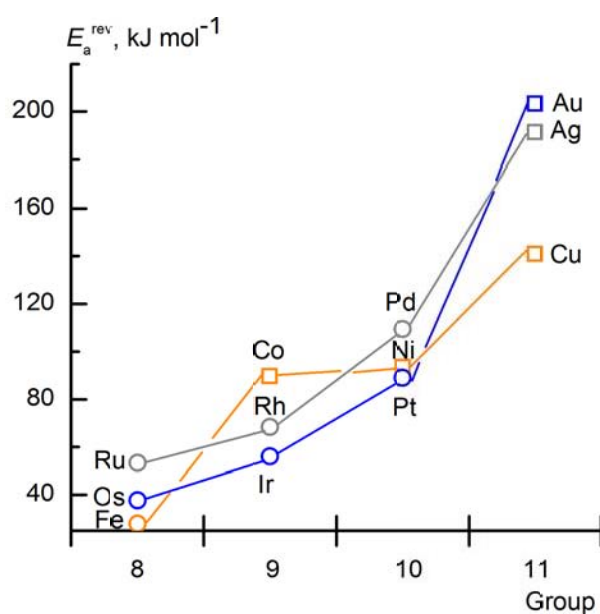

**Figure S7.** Activation energies  $E_{\text{a}}^{\text{rev}}$  of the backward reaction, i.e., C-OH dissociation, for the metals under study. Circles and squares denote top and bridge TS structures, respectively. The lines are a guide for the eye.
